# Supplementary material
Source: Springer Nature journal article supplement (https://www.springermedizin.de/resource/supplementary/13256_2007_135_MOESM2_ESM.pdf/9645346)

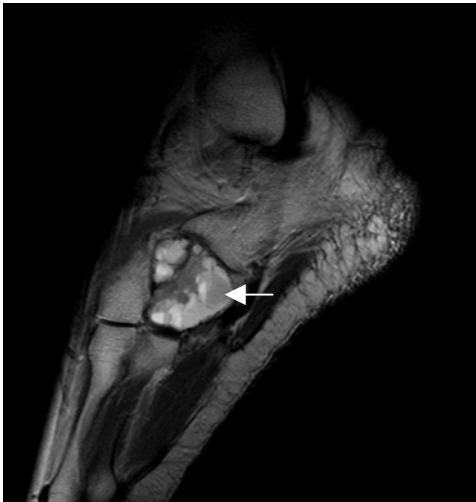

(a)

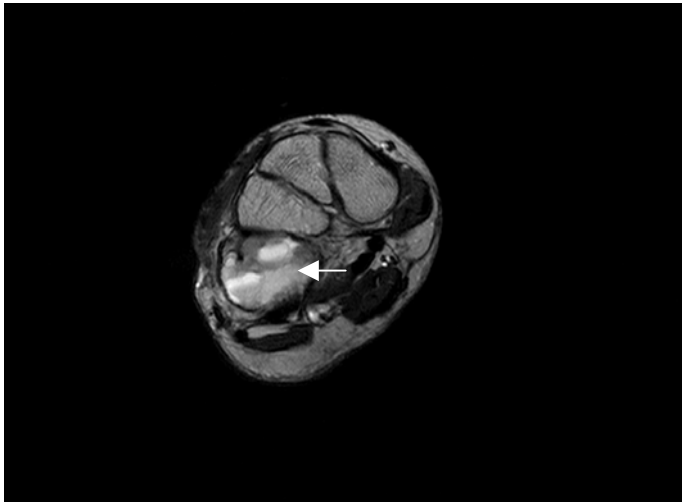

(b)

Supplement: MOESM2 [file 9645346]
